# Supplementary material
Source: HighWire-hosted journal article supplement (https://www.cmaj.ca/highwire/filestream/58718/field_highwire_adjunct_files/0/low-gupta-1-at.pdf)
Supplement: low-gupta-1-at.pdf [file low-gupta-1-at.pdf]

**Appendix 1: All-cause mortality associated with the use of statins in primary prevention settings as reported in recent meta-analyses of their efficacy**

| Study                              | No. of included trials | No. of patients involved | Median duration of follow-up, yr | RR (95% CI)      |
|------------------------------------|------------------------|--------------------------|----------------------------------|------------------|
| Tonelli et al. 2011 <sup>1</sup>   | 29                     | 80 711                   | 2.0                              | 0.90 (0.84–0.97) |
| Ray et al. 2010 <sup>2</sup>       | 11                     | 65 229                   | 3.7                              | 0.91 (0.83–1.01) |
| Brugts et al. 2009 <sup>3</sup>    | 10                     | 70 388                   | 4.1                              | 0.88 (0.81–0.96) |
| Thavendiranathan 2006 <sup>4</sup> | 7                      | 42 848                   | 4.3                              | 0.92 (0.84–1.01) |
| Taylor et al. 2011 <sup>5</sup>    | 14                     | 34 272                   | NA                               | 0.83 (0.73–0.95) |

Note: CI = confidence interval, NA = not available, RR = relative risk.

**References**

1. Tonelli M, Lloyd A, Clement F, et al. Efficacy of statins for primary prevention in people at low cardiovascular risk: a meta-analysis. *CMAJ* 2011 Oct. 17 [Epub ahead of print].
2. Ray KK, Seshasai SR, Erqou S, et al. Statins and all-cause mortality in high-risk primary prevention: a meta-analysis of 11 randomized controlled trials involving 65,229 participants. *Arch Intern Med* 2010;170:1024-31.
3. Brugts JJ, Yetgin T, Hoeks SE, et al. The benefits of statins in people without established cardiovascular disease but with cardiovascular risk factors: meta-analysis of randomised controlled trials. *BMJ* 2009;338:b2376. doi: 10.1136/bmj.b2376.
4. Thavendiranathan P, Bagai A, Brookhart MA, et al. Primary prevention of cardiovascular diseases with statin therapy: a meta-analysis of randomized controlled trials. *Arch Intern Med* 2006;166:2307-13.
5. Taylor F, Ward K, Moore TH, et al. Statins for the primary prevention of cardiovascular disease [review]. *Cochrane Database Syst Rev* 2011;(1):CD004816.
